# Supplementary material for: Performance of different clinical trial designs to evaluate treatments during an epidemic
Source: PubMed Central journal article supplement (PMC6133355; doi:10.1371/journal.pone.0203387), 2018-09-11
Supplement: pone.0203387.s002.pdf [file pone.0203387.s002.pdf]

**S2 Appendix Spline model.** The log-log transformation of the survival function is modelled as a natural cubic spline function of  $\log(t)$  [13, 14].

$$\log(-\log(S(t))) = \gamma_0 + \gamma_1 \log(t) + \gamma_2 v_1(\log(t)) + \dots + \gamma_{m+1} v_m(\log(t))$$

where  $v_j(x)$  is the  $j$ -th basis function

$$v_j(x) = (x - k_j)_+^3 - \lambda_j (x - k_{min})_+^3 - (1 - \lambda_j) (x - k_{max})_+^3,$$

where  $\lambda_j = (k_{max} - k_j)/(k_{max} - k_{min})$  and  $(x - a)_+ = \max(0, x - a)$ .

Two separate spline models with 4 internal knots are fitted for the two cause-specific hazards for recovery and death based on the complete data of all confirmed and hospitalized cases. The location of the knots and the values of  $\gamma_j$  are given in Table A.

Table A: **Spline models.**

| Model | Parameter  | Index j |      |       |       |       |       |
|-------|------------|---------|------|-------|-------|-------|-------|
|       |            | 1       | 2    | 3     | 4     | 5     | 6     |
| 1     | $k_j$      | -1.39   | 2.57 | 2.77  | 3.00  | 3.22  | 5.38  |
|       | $\gamma_j$ | -7.85   | 0.67 | -1.94 | -6.47 | 16.67 | -8.27 |
| 2     | $k_j$      | -1.39   | 1.79 | 2.08  | 2.40  | 2.77  | 5.57  |
|       | $\gamma_j$ | -5.52   | 0.97 | -1.56 | 0.34  | 2.81  | -1.63 |

Knots ( $k_j$ ) on the log-scale and coefficients ( $\gamma_j$ ) of the two spline models ( $j = 1, \dots, 6$ ).
