# Supplementary material for: Performance of different clinical trial designs to evaluate treatments during an epidemic
Source: PubMed Central journal article supplement (PMC6133355; doi:10.1371/journal.pone.0203387), 2018-09-11
Supplement: pone.0203387.s004.pdf [file pone.0203387.s004.pdf]

**S1 Table Stopping boundaries and cumulative sample sizes at each analysis for the frequentist designs.**

**Table A: Stopping boundaries and cumulative sample sizes at each analysis for the frequentist designs.**

| Design | Analysis | Sample size per arm | Stopping boundary |       |
|--------|----------|---------------------|-------------------|-------|
|        |          |                     | Lower             | Upper |
| TACC   | 1        | 105                 | 1.96              | 1.96  |
| GSD    | 1        | 22                  | -0.92             | 3.25  |
|        | 2        | 44                  | -0.07             | 2.99  |
|        | 3        | 66                  | 0.66              | 2.69  |
|        | 4        | 88                  | 1.32              | 2.37  |
|        | 5        | 110                 | 1.97              | 1.97  |
| MAMS   | 1        | 22                  | -0.67             | 5.15  |
|        | 2        | 44                  | -0.41             | 3.72  |
|        | 3        | 66                  | -0.04             | 3.12  |
|        | 4        | 88                  | 0.33              | 2.76  |
|        | 5        | 110                 | 2.54              | 2.54  |
